# Supplementary material for: MOF/Polymer Mixed-Matrix Membranes Preparation: Effect of Main Synthesis Parameters on CO2/CH4 Separation Performance
Source: MDPI journal article supplement (doi:10.3390/membranes12040425), 2022-04-14
Supplement: s1 [file s1]

Supporting Information for:

# MOF/Polymer Mixed-Matrix Membranes Preparation: Effect of Main Synthesis Parameters on CO<sub>2</sub>/CH<sub>4</sub> Separation Performance

Harun Kulak, Raymond Thür and Ivo F. J. Vankelecom \*

Membrane Technology Group (MTG), Centre for Membrane Separations, Adsorption,  
Catalysis and  
Spectroscopy for Sustainable Solutions (cMACS), Faculty of Bioscience Engineering, KU  
Leuven, Celestijnenlaan 200F, P.O. Box 2454, 3001 Leuven, Belgium;  
harun.kulak@kuleuven.be (H.K.);  
raymond.thur@kuleuven.be (R.T.)  
\* Correspondence: ivo.vankelecom@kuleuven.be

**Table S1.** Composition of casting solutions used for membrane preparation.<sup>†</sup>

| Sample    | Polymer (g) | Solvent (g) | Filler (g) |
|-----------|-------------|-------------|------------|
| P3-S-M0   | 0.12        | 3.88        | -          |
| P3-S-M10  | 0.12        | 3.88        | 0.014      |
| P3-S-M30  | 0.12        | 3.88        | 0.052      |
| P3-S-M0   | 0.18        | 5.82        | -          |
| P3-S-M10  | 0.18        | 5.82        | 0.020      |
| P3-S-M30  | 0.18        | 5.82        | 0.078      |
| P4-S-M0   | 0.16        | 3.84        | -          |
| P4-S-M10  | 0.16        | 3.84        | 0.018      |
| P4-S-M30  | 0.16        | 3.84        | 0.068      |
| P4-L-M0   | 0.24        | 5.76        | -          |
| P4-L-M10  | 0.24        | 5.76        | 0.027      |
| P4-L-M30  | 0.24        | 5.76        | 0.103      |
| P5-S-M0   | 0.20        | 3.80        | -          |
| P5-S-M10  | 0.20        | 3.80        | 0.023      |
| P5-S-M30  | 0.20        | 3.80        | 0.086      |
| P5-L-M0   | 0.30        | 5.70        | -          |
| P5-L-M10  | 0.30        | 5.70        | 0.034      |
| P5-L-M30  | 0.30        | 5.70        | 0.128      |
| P7-S-M0   | 0.28        | 3.72        | -          |
| P7-S-M10  | 0.28        | 3.72        | 0.032      |
| P7-S-M30  | 0.28        | 3.72        | 0.120      |
| P7-L-M0   | 0.42        | 5.58        | -          |
| P7-L-M10  | 0.42        | 5.58        | 0.047      |
| P7-L-M30  | 0.42        | 5.58        | 0.180      |
| P10-S-M0  | 0.40        | 3.60        | -          |
| P10-S-M10 | 0.40        | 3.60        | 0.044      |
| P10-S-M30 | 0.40        | 3.60        | 0.172      |
| P10-L-M0  | 0.60        | 5.40        | -          |
| P10-L-M10 | 0.60        | 5.40        | 0.067      |
| P10-L-M30 | 0.60        | 5.40        | 0.257      |
| P15-S-M0  | 0.60        | 3.40        | -          |
| P15-S-M10 | 0.60        | 3.40        | 0.067      |

|           |      |      |       |
|-----------|------|------|-------|
| P15-S-M30 | 0.60 | 3.40 | 0.257 |
| P15-L-M0  | 0.90 | 5.10 | -     |
| P15-L-M10 | 0.90 | 5.10 | 0.100 |
| P15-L-M30 | 0.90 | 5.10 | 0.386 |

<sup>†</sup> "PX" represents the polymer concentration of the solutions while "S" ("L") indicates the small (large) solution volume. "MX" corresponds to the amount of MOF loading (wt.%).

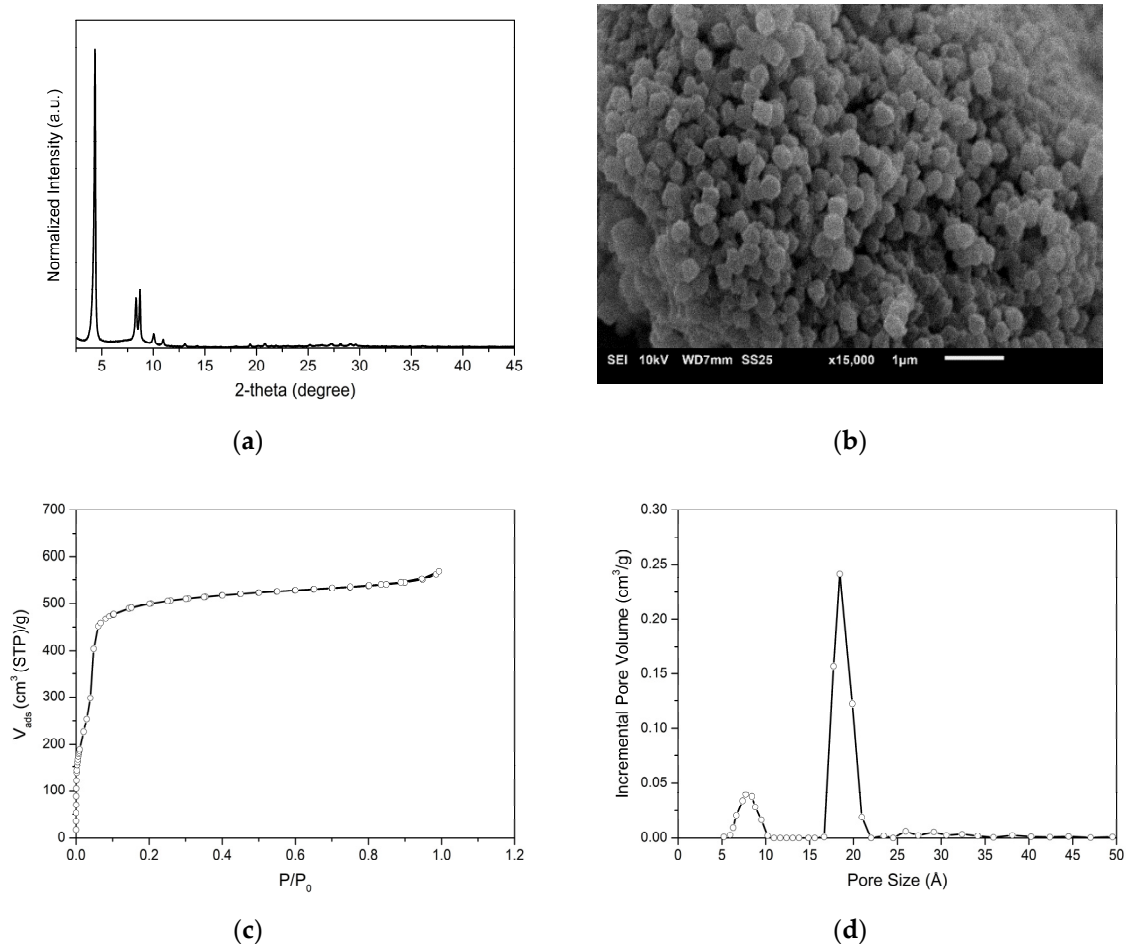

**Figure S1.** (a) XRD pattern, (b) SEM image, (c) N<sub>2</sub> adsorption-desorption isotherm, and (d) the distribution of incremental pore volume of MOF-808.

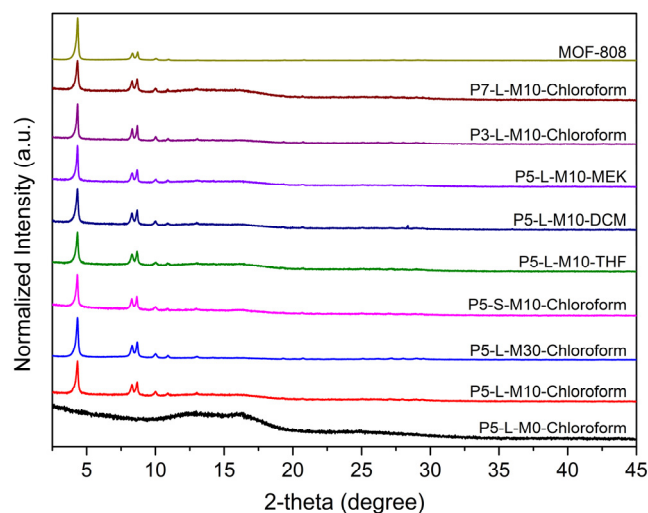

**Figure S2.** XRD patterns of 6FDA-DAM:DABA MMMs prepared with different synthesis parameters. “PX” represents the polymer concentration of the casting solutions while “L” (“S”) implies the large (small) solution volume. “MX” corresponds to the amount of MOF loading (wt.%) and solvent name indicates the solvent used during the preparation of that membrane.

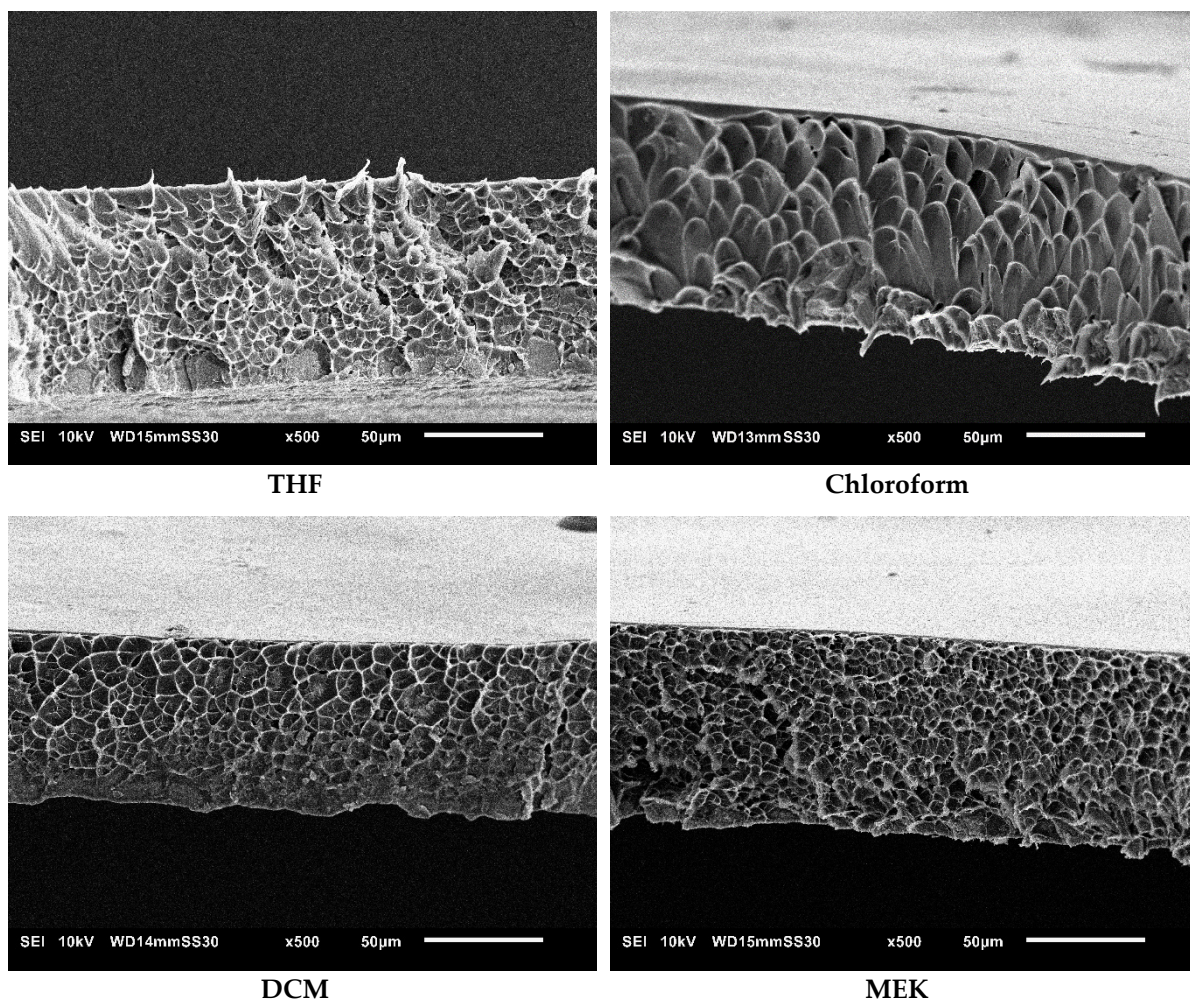

**Figure S3.** SEM cross-sections of 6FDA-DAM:DABA MMMs prepared with different solvents. All membranes are cast from large volume of solution with 5 wt.% polymer concentration and 10 wt.% MOF-808 loading.

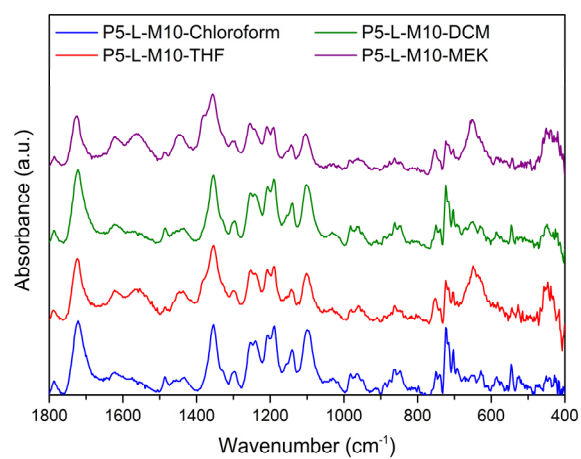

(a)

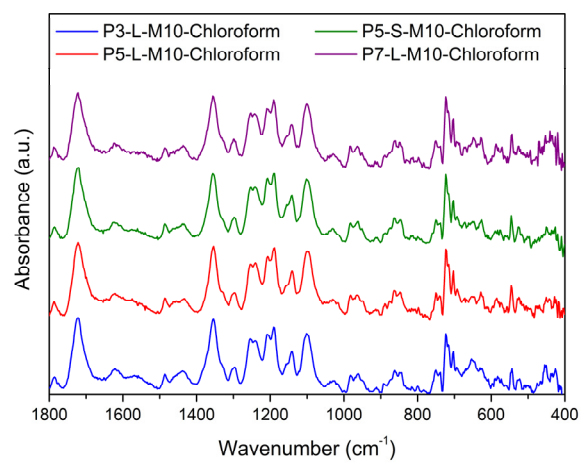

(b)

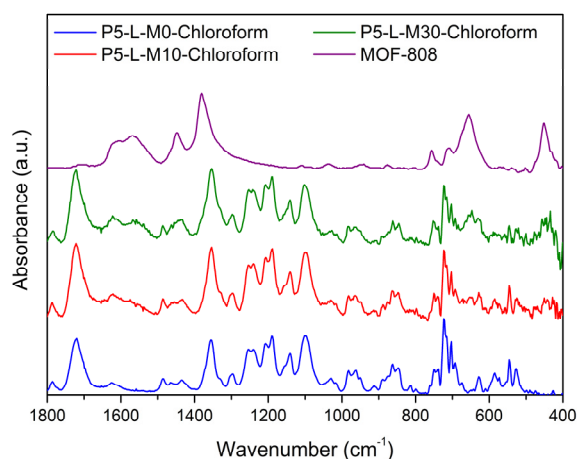

(c)

**Figure S4.** FTIR spectra of 6FDA-DAM:DABA MMMs prepared with different synthesis parameters: (a) effect of solvent type, (b) effect of polymer concentration and casting solution volume, (c) effect of filler amount. “PX” represents the polymer concentration of the casting solutions while “L” (“S”) indicates the large (small) solution volume. “MX” corresponds to the amount of MOF loading (wt.%).

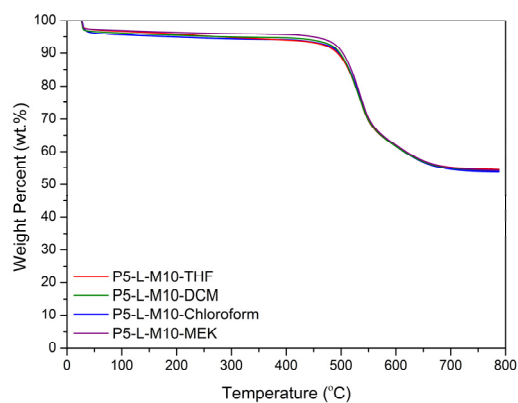

(a)

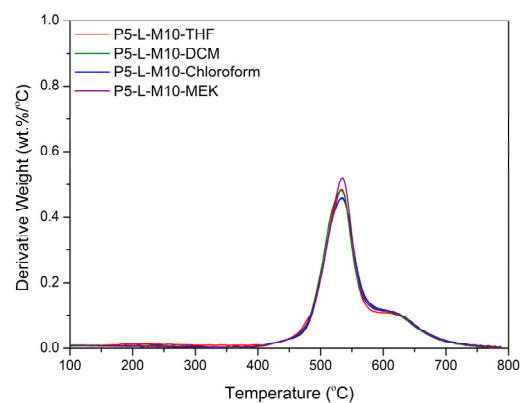

(b)

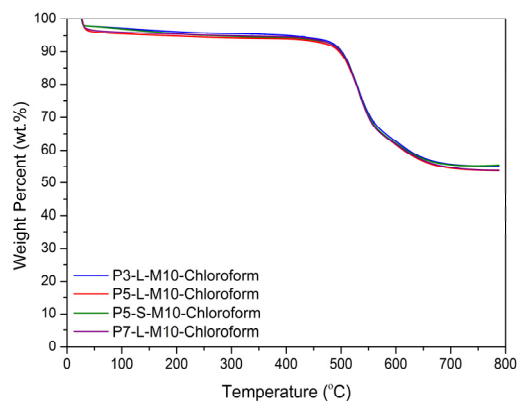

(c)

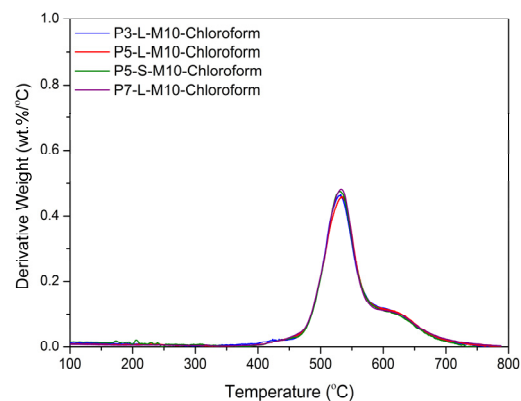

(d)

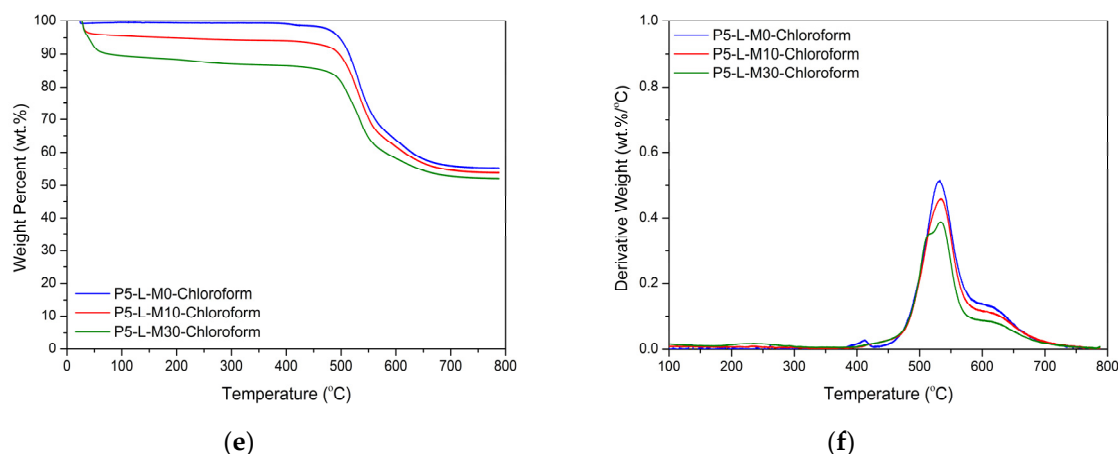

**Figure S5.** TGA (a,c,e) and DTG (b,d,f) curves of 6FDA-DAM:DABA MMMs prepared with different synthesis parameters: (a,b) effect of solvent type, (c,d) effect of polymer concentration and casting solution volume, (e, f) effect of filler amount. “PX” represents the polymer concentration of the casting solutions while “L” (“S”) indicates the large (small) solution volume. “MX” corresponds to the amount of MOF loading (wt.%).

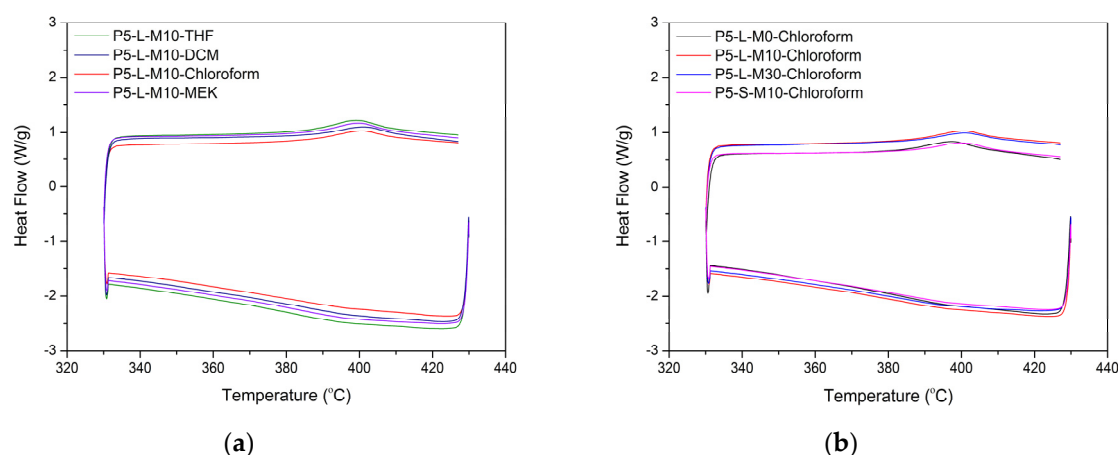

**Figure S6.** DSC curves of 6FDA-DAM:DABA MMMs prepared with different synthesis parameters: (a) effect of solvent type, (b) effect of filler amount and casting solution volume. “PX” represents the polymer concentration of the casting solutions while “L” (“S”) indicates the large (small) solution volume. “MX” corresponds to the amount of MOF loading (wt.%).

**Table S2.** Thermal decomposition ( $T_d$ ) and glass transition ( $T_g$ ) temperatures of 6FDD-based MMMs.

| Sample              | $T_d$ (°C) | $T_g$ (°C) |
|---------------------|------------|------------|
| P5-L-M0-Chloroform  | 498        | 389        |
| P5-L-M10-Chloroform | 497        | 396        |



|                     |     |     |
|---------------------|-----|-----|
| P5-L-M30-Chloroform | 492 | 395 |
| P5-S-M10-Chloroform | 497 | 396 |
| P5-L-M10-THF        | 498 | 395 |
| P5-L-M10-DCM        | 494 | 395 |
| P5-L-M10-MEK        | 495 | 396 |
| P3-L-M10-Chloroform | 496 | NA  |
| P7-L-M10-Chloroform | 498 | NA  |

NA: Not Available.

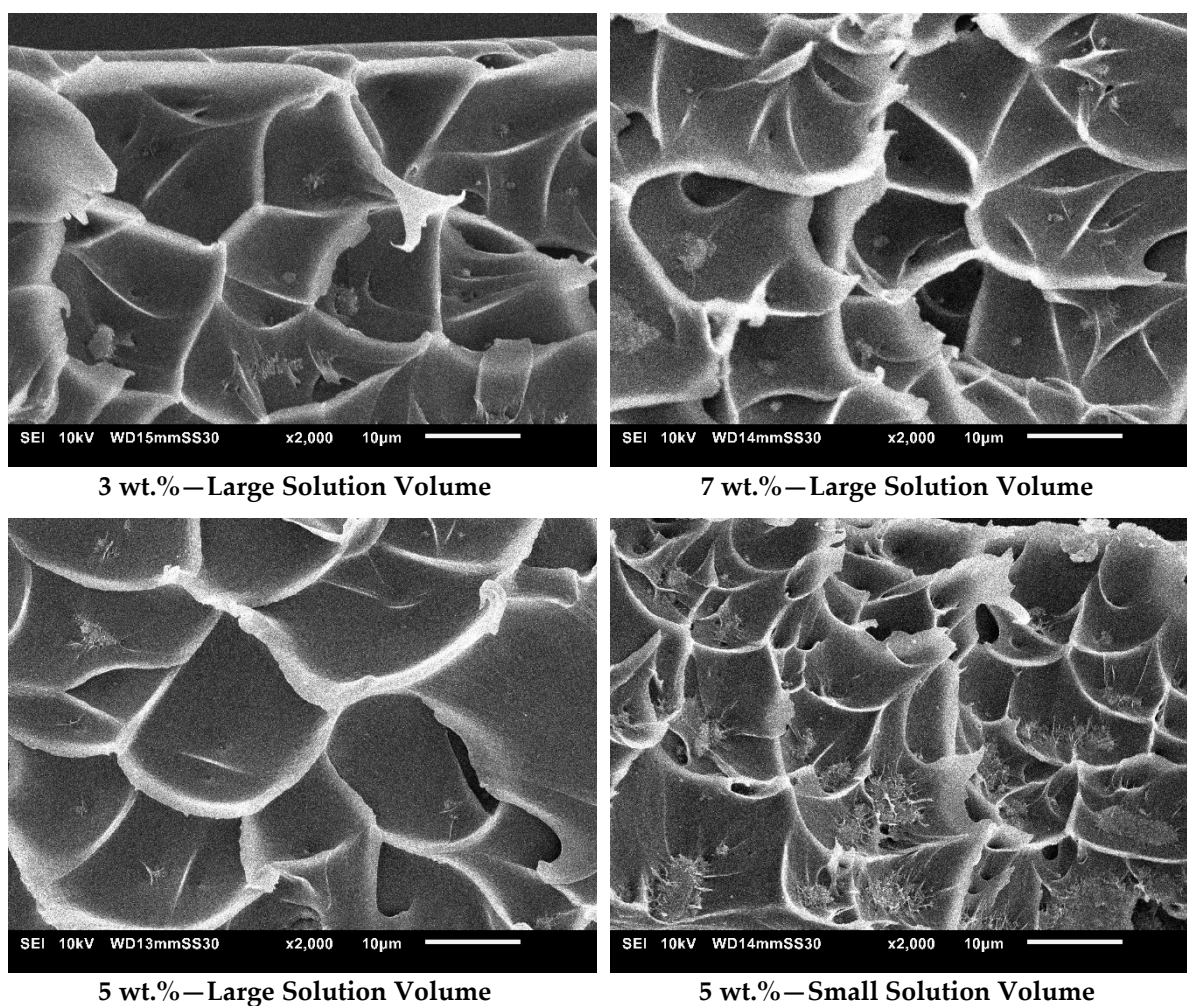

**Figure S7.** SEM cross-sections of 6FDA-DAM:DABA MMMs prepared with different polymer concentration and casting solution volume. All membranes are cast from solution with 10 wt.% MOF-808 loading.

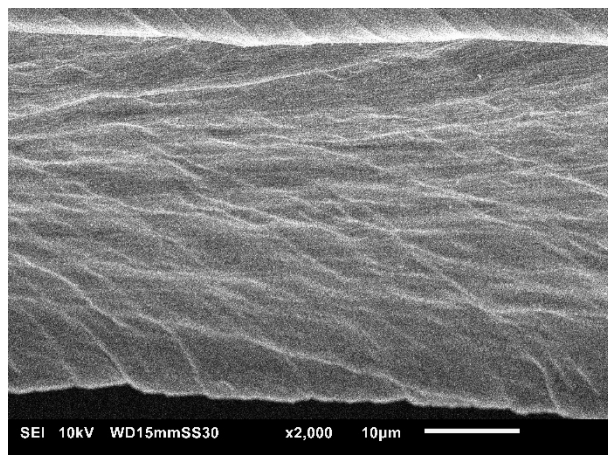

**0 wt.% MOF-808**

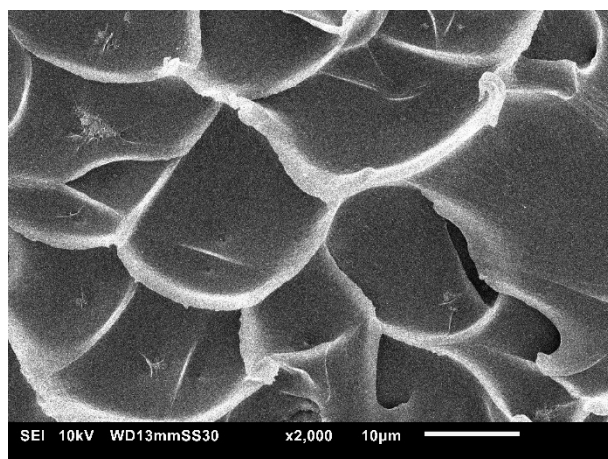

**10 wt.% MOF-808**

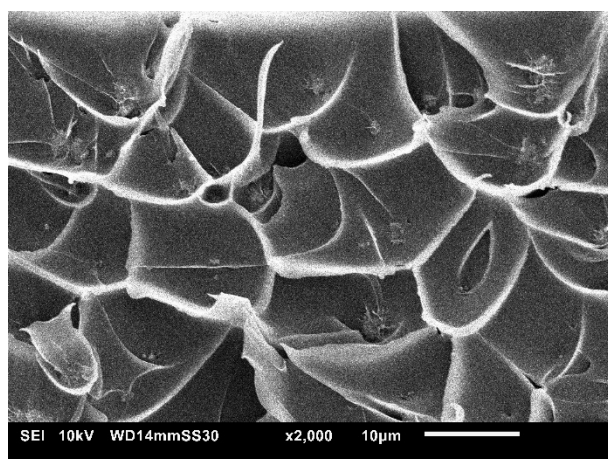

**30 wt.% MOF-808**

**Figure S8.** SEM cross-sections of 6FDA-DAM:DABA MMMs prepared with different MOF loadings. All membranes are cast from large volume of solution with 5 wt.% polymer concentration.
